# Supplementary material for: Fmoc-conjugated dipeptide-based hydrogels and their pH-tuneable behaviour
Source: Royal Society of Chemistry journal article supplement (doi:10.1039/d4sm01282h), 2025-01-01
Supplement: d4sm01282h1.pdf [file d4sm01282h1.pdf]

# Supporting Information

## Fmoc-conjugated dipeptides-based hydrogels and their pH-tuneable behaviour

Soumen Kuila<sup>a</sup>, Souvik Misra<sup>a</sup>, Riya Saha<sup>b</sup>, Laboni Ghosh<sup>a</sup>, Pijush Singh<sup>a,c</sup>, Anamika Ghosh<sup>b</sup>, Kolimi Prashanth Reddy<sup>d</sup>, Subhradip Pandit<sup>e</sup>, Debobani Ganguly<sup>b</sup>, Pallab Datta<sup>d</sup>, Samik Bindu<sup>e</sup>, Gouranga Nandi<sup>f</sup>, Suman Samai<sup>g</sup> and Jayanta Nanda<sup>a,\*</sup>

---

a. Department of Chemistry, University of North Bengal, Raja Rammohanpur, Siliguri, West Bengal, PIN-734013, India. Email- [jayanta@nbu.ac.in](mailto:jayanta@nbu.ac.in)

b. Centre for Health Science and Technology, JIS Institute of Advanced Studies and Research Kolkata, JIS University, 700091, India

c. Department of Biochemistry and Biophysics, University of Kalyani, Kalyani 741235, West Bengal, India

d. Department of Pharmaceutics, National Institute of Pharmaceutical Education and Research, Kolkata (NIPER-K), Chunilal Bhawan, 168, Maniktala Main Road, Kolkata, West Bengal, PIN-700054, India.

e. Department of Zoology, Cooch Behar Panchanan Barma University, Cooch Behar, West Bengal, India

f. Department of Pharmaceutical Technology, University of North Bengal, Darjeeling 734013, India

g. Department of Chemistry, Prabhat Kumar College Contai, Contai, Purba Medinipur, West Bengal, India

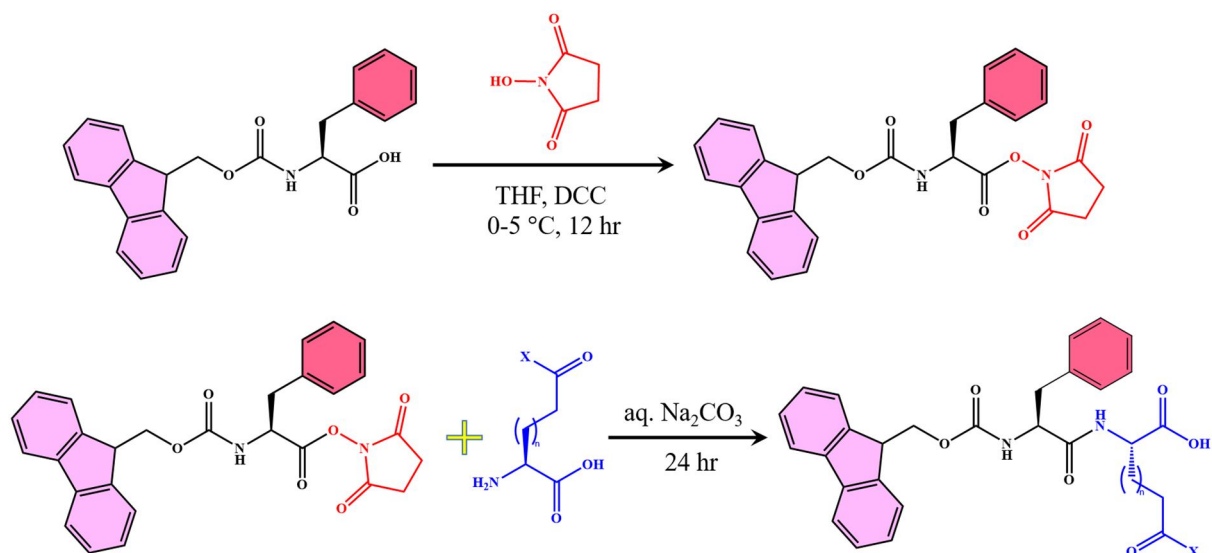

**Figure S1.** The general synthetic procedure of synthesis of Fmoc-protected dipeptides from Fmoc-Phe-OH. Here, the –COOH end is activated by coupling with N-hydroxy succinamide (NHS) in the presence of coupling agent DCC in THF medium at 0-5 °C. As formed Fmoc-Phe-NHS adduct in THF reacted with various hydrophilic amino acids (dissolved in Na<sub>2</sub>CO<sub>3</sub>) to give desired dipeptides.

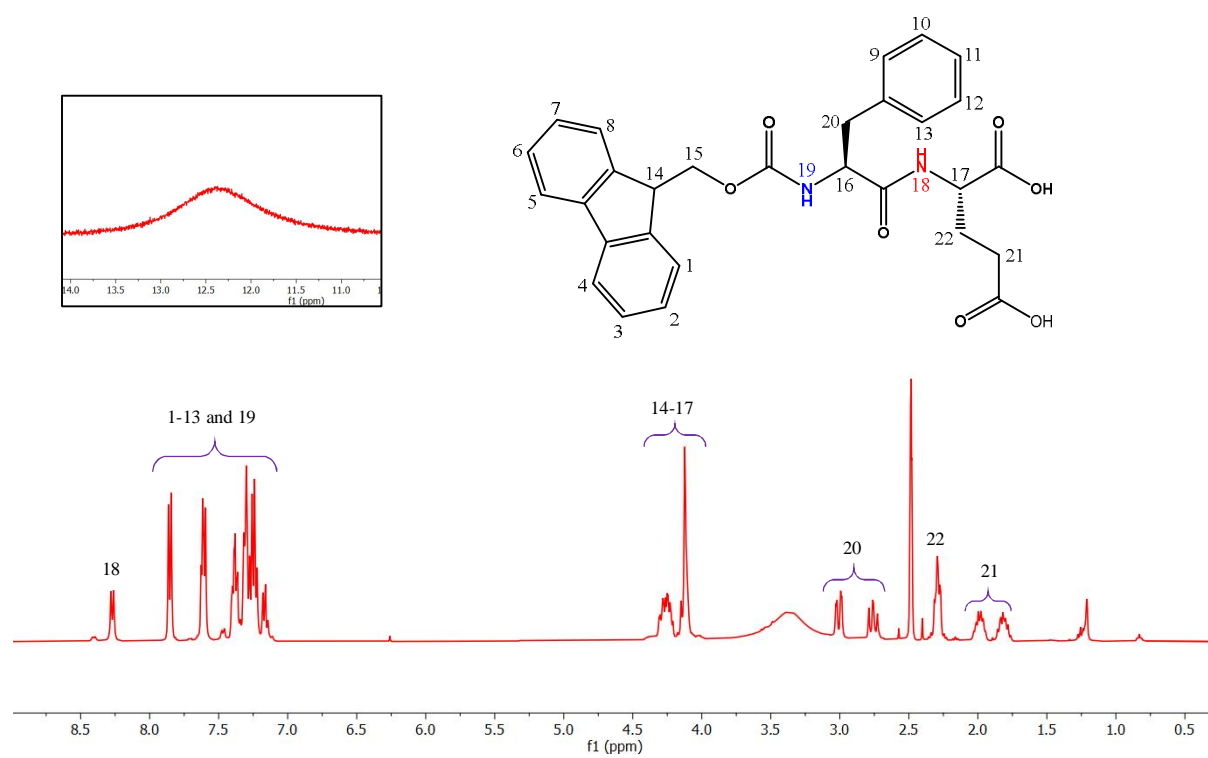

**Figure S2.**  $^1\text{H}$  NMR (400 MHz) Spectrum of Fmoc-Phe-Glu-OH (FE) in  $\text{DMSO-}d_6$  (0.5 to 8.5 ppm). Carboxylic acid peak is shown in inset.

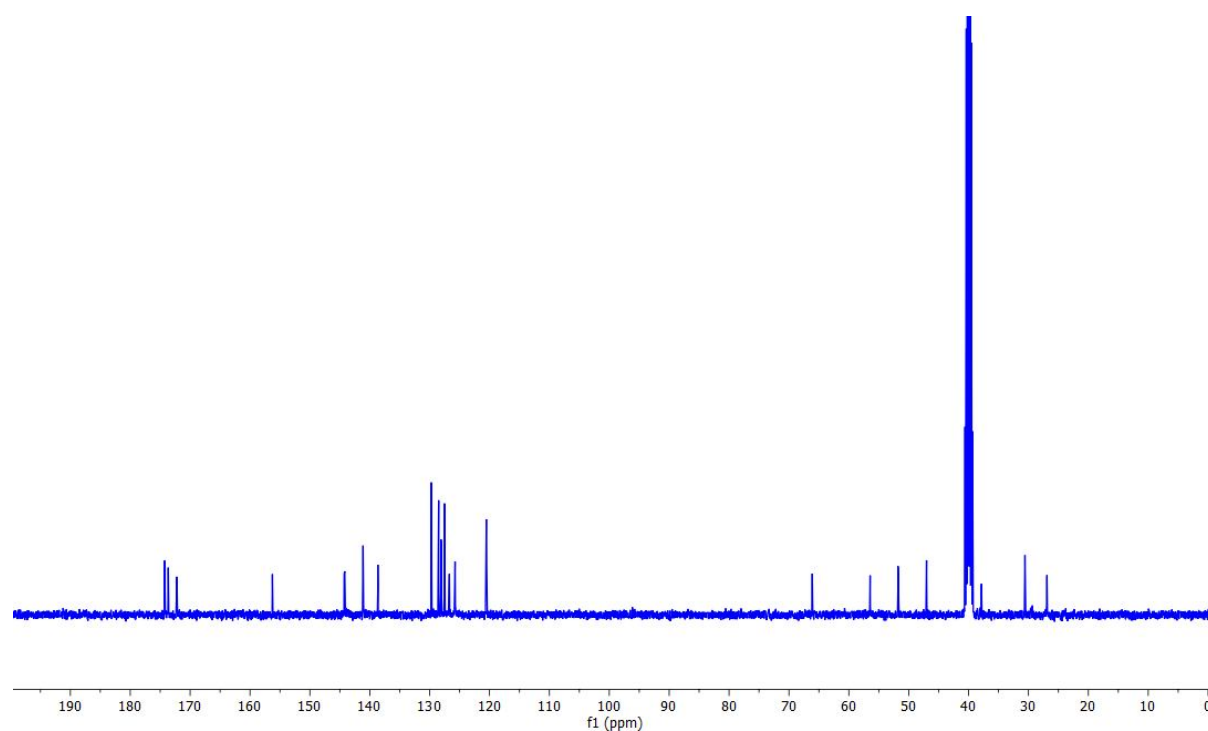

**Figure S3.**  $^{13}\text{C}$ -NMR (100 MHz) spectrum of Fmoc-Phe-Glu-OH (FE) in  $\text{DMSO-}d_6$  solvent.

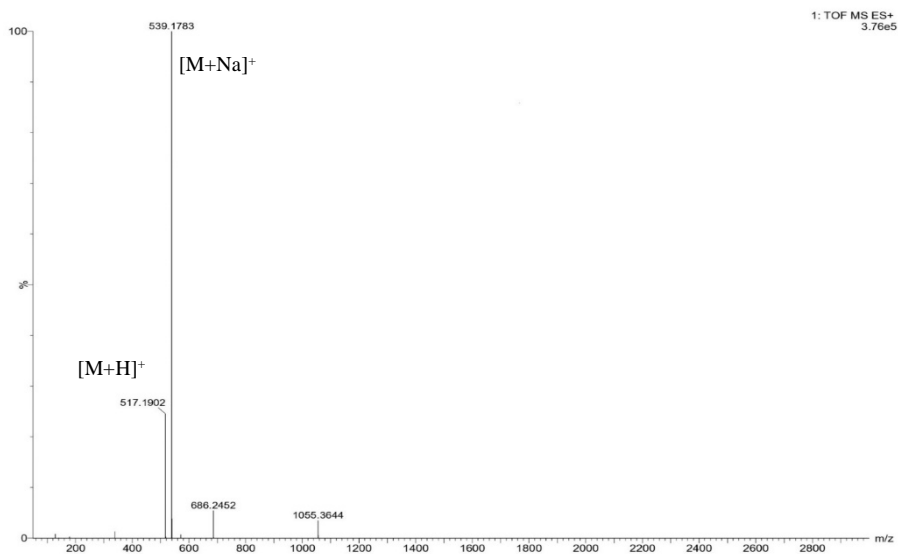

**Figure S4.** HRMS spectrum of Fmoc-Phe-Glu-OH (FE).

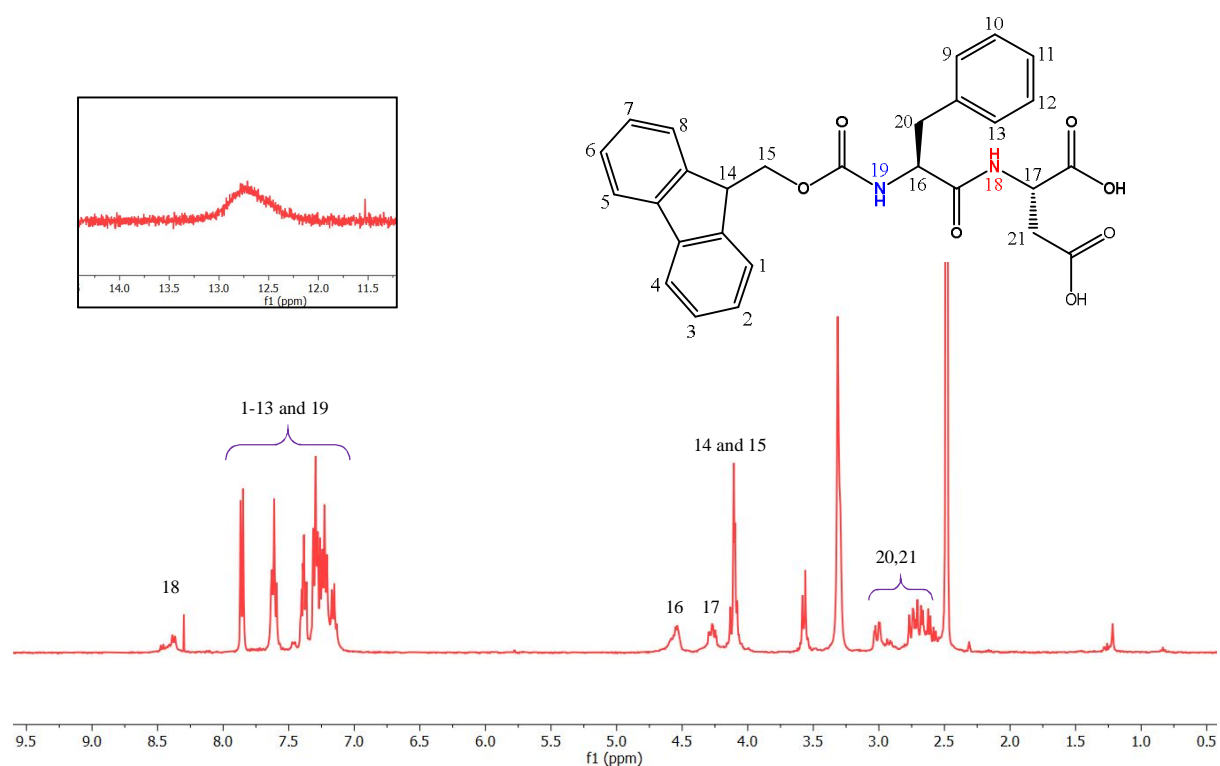

**Figure S5.**  $^1\text{H}$  NMR (400 MHz) Spectrum of Fmoc-Phe-Asp-OH (FD) in  $\text{DMSO-}d_6$  (0.5 to 9.5 ppm). Carboxylic acid peak is shown in inset.

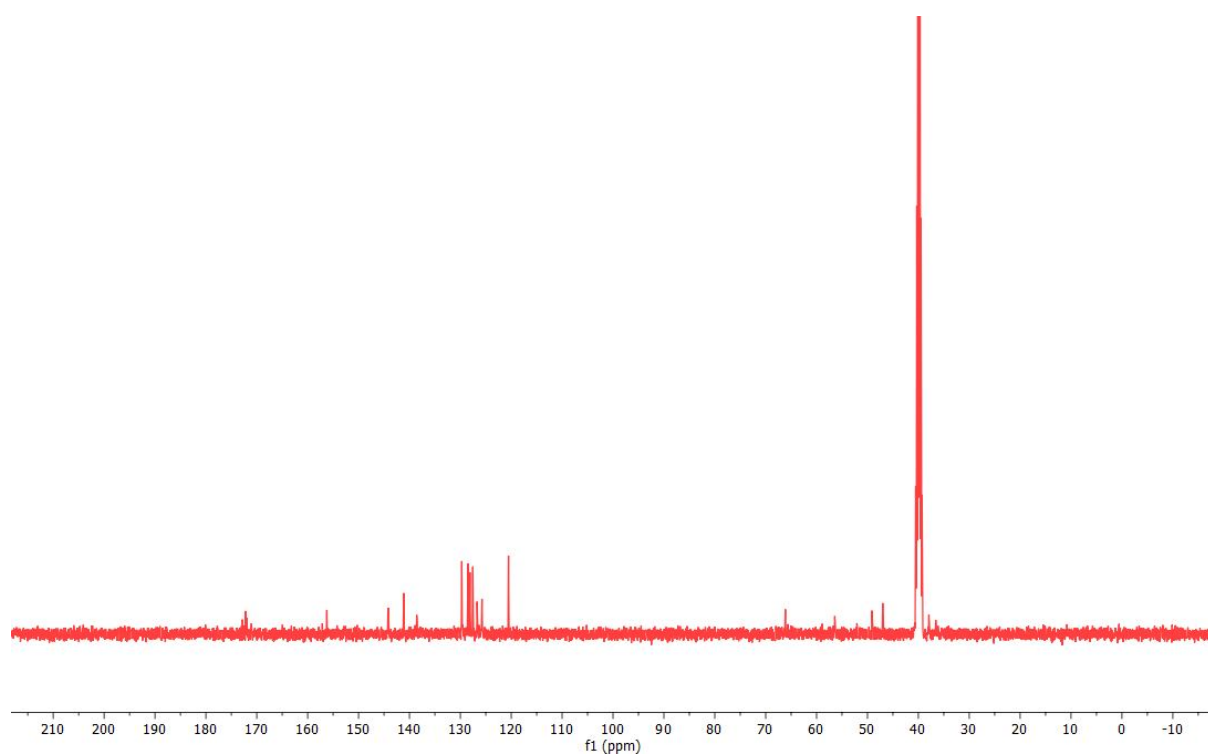

**Figure S6.**  $^{13}\text{C}$ -NMR (100 MHz) spectrum of Fmoc-Phe-Asp-OH (FD) in  $\text{DMSO-}d_6$  solvent.

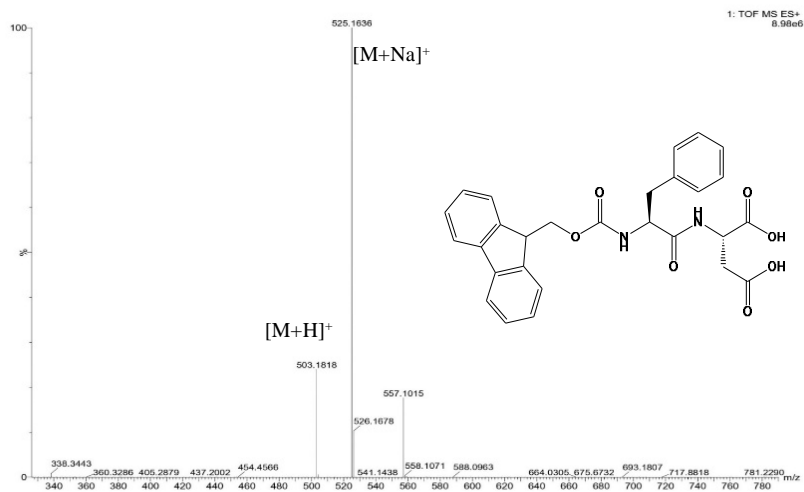

**Figure S7.** HRMS spectrum of Fmoc-Phe-Asp-OH (FD).

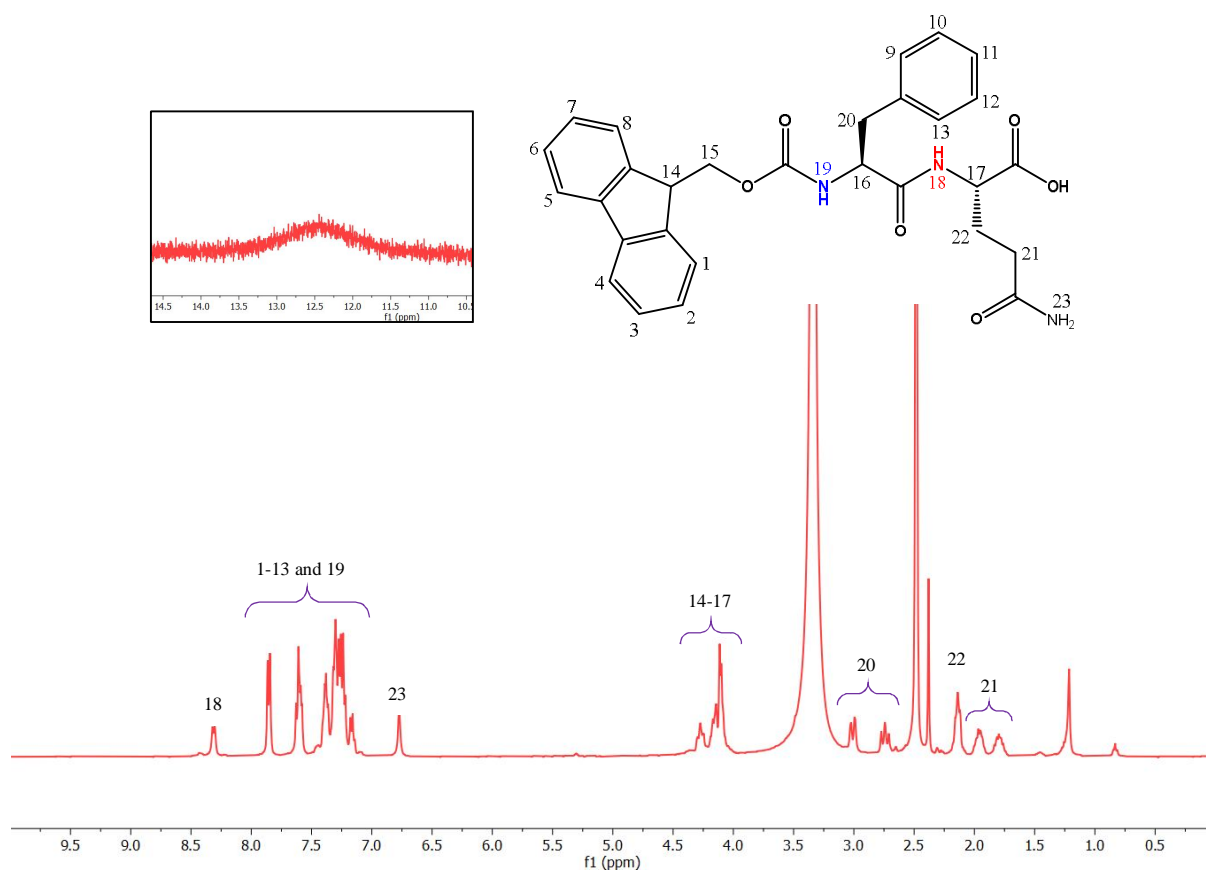

**Figure S8.**  $^1\text{H}$  NMR (400 MHz) Spectrum of Fmoc-Phe-Gln-OH (FQ) in  $\text{DMSO-}d_6$  (0.5 to 9.5 ppm). Carboxylic acid peak is shown in inset.

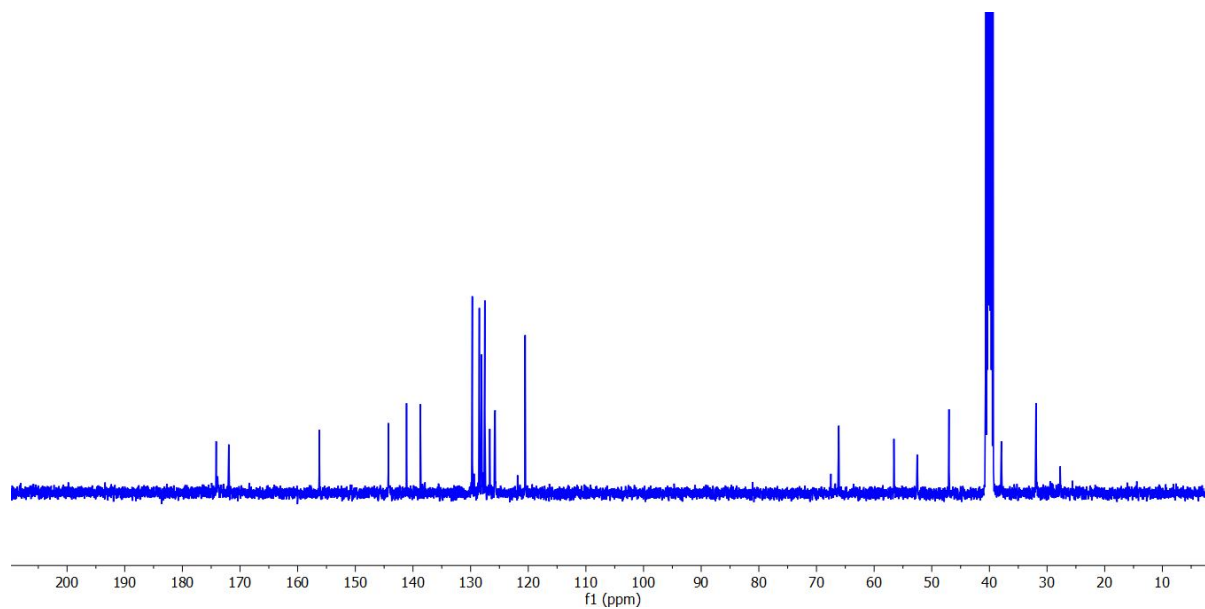

**Figure S9.**  $^{13}\text{C}$ -NMR (100 MHz) spectrum of Fmoc-Phe-Gln-OH (FQ) in  $\text{DMSO-}d_6$  solvent.

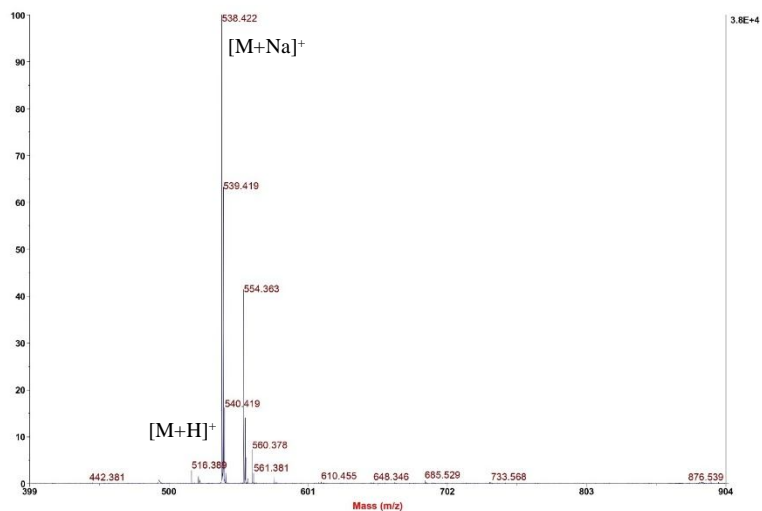

**Figure S10.** HRMS spectrum of Fmoc-Phe-Gln-OH (FQ).

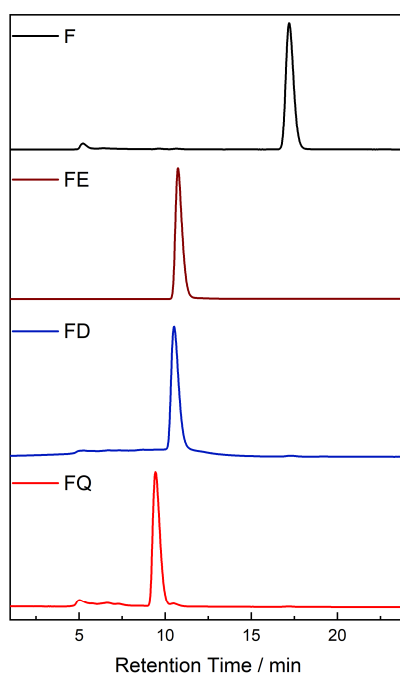

**Figure S11.** Comparison of HPLC traces of three dipeptides with Fmoc-Phe-OH (F).

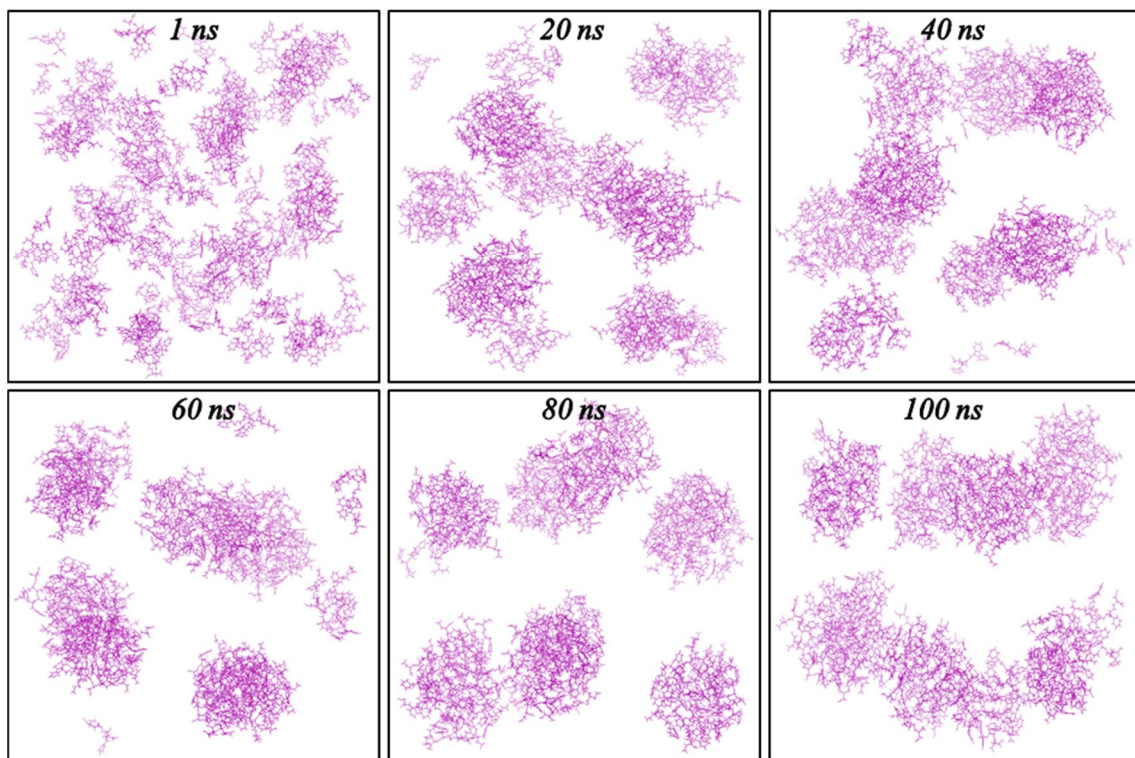

**Figure S12.** Time-dependent aggregation of FD.

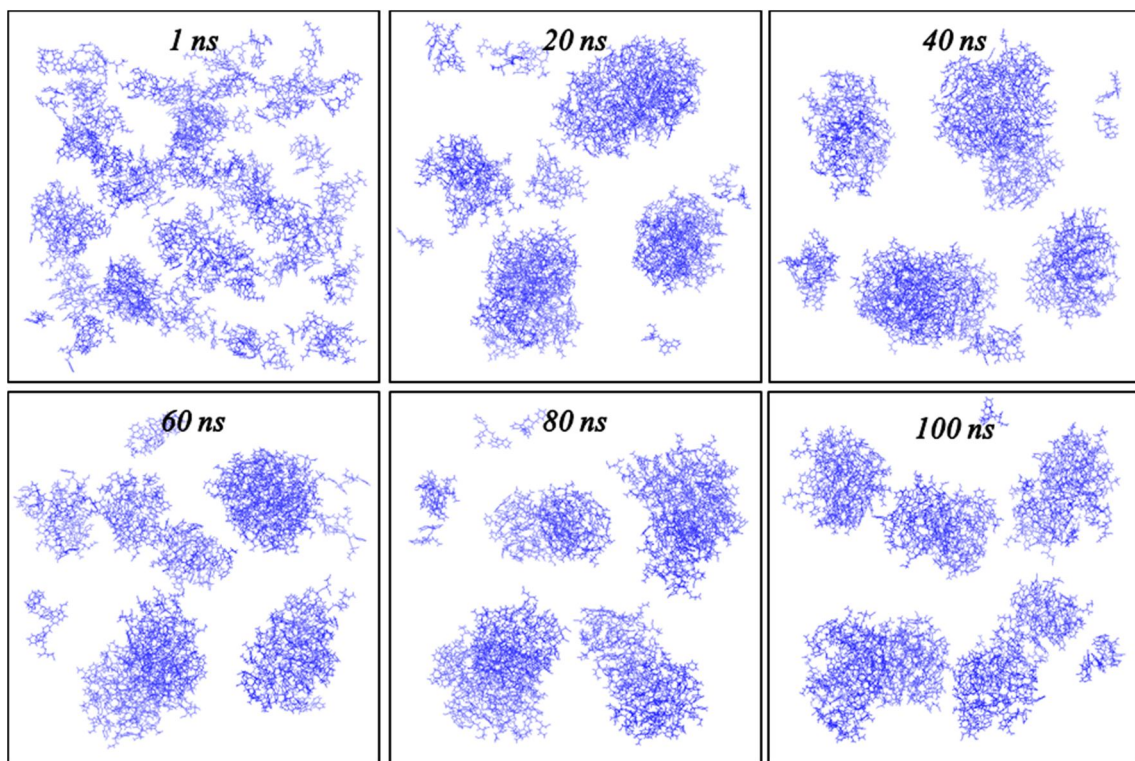

**Figure S13.** Time-dependent aggregation of FE.



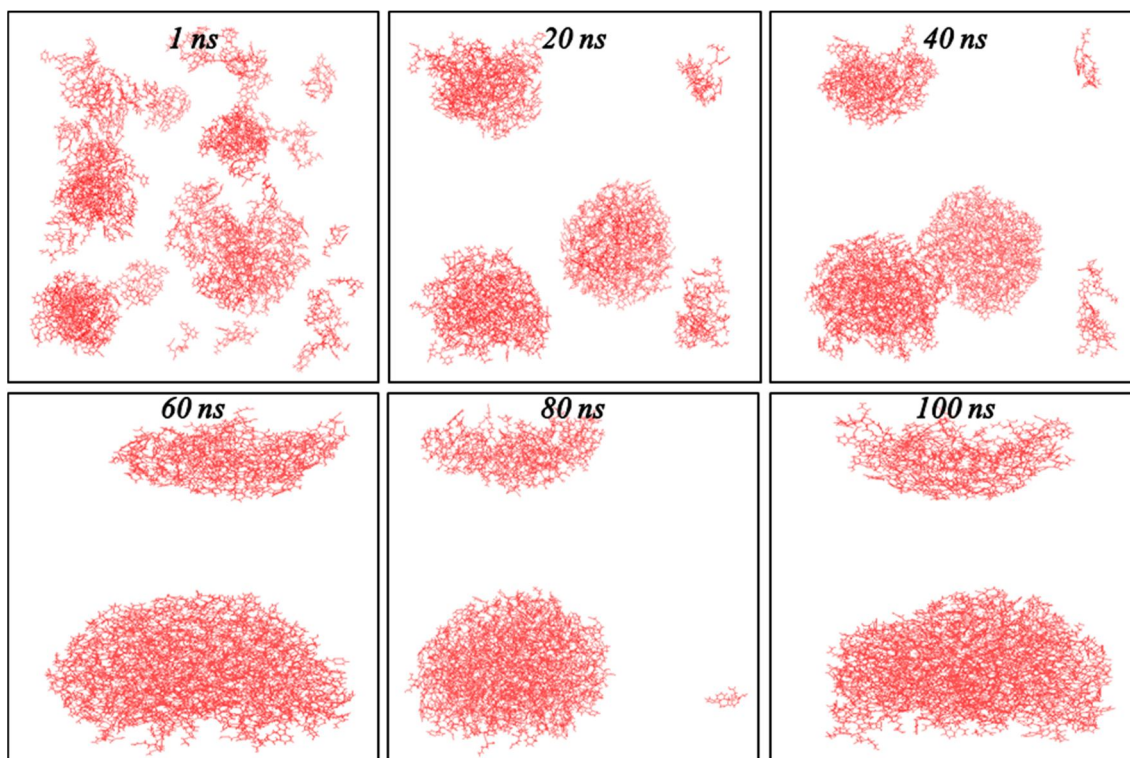

**Figure S14.** Time-dependent aggregation of FQ.

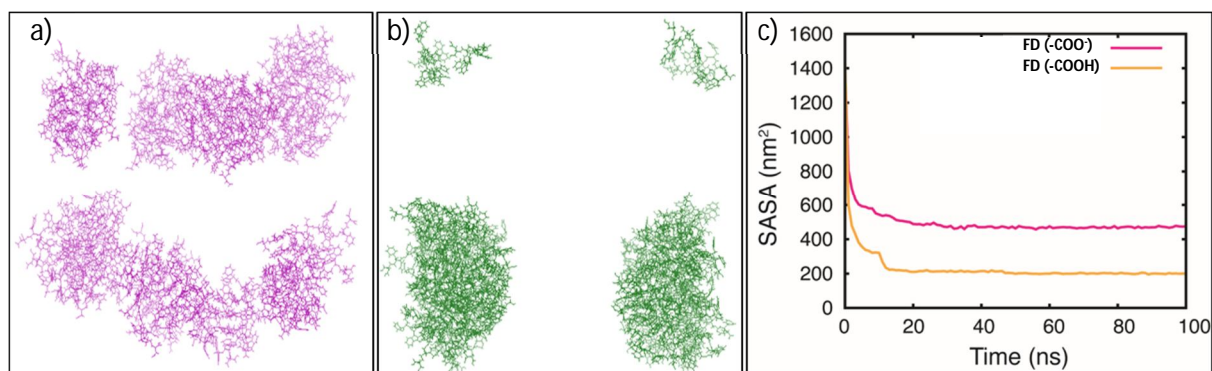

**Figure S15.** MD simulated self-assembled cluster of FD after 100 ns: a) both carboxylic acid end as -COO<sup>-</sup> form, and b) both carboxylic acid end as -COOH form. c) Comparison of SASA value of FD when fully deprotonated and protonated state.

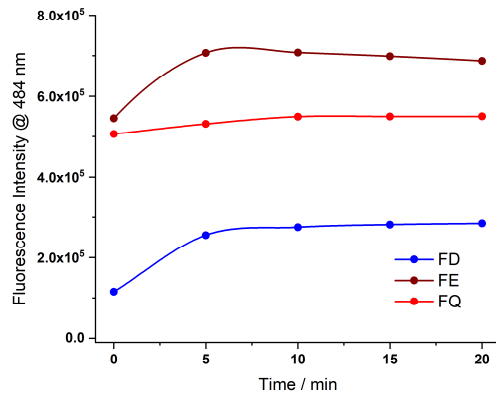

**Figure S16.** Changes in fluorescence intensity at 484 nm are plotted against time at pH 6.0.

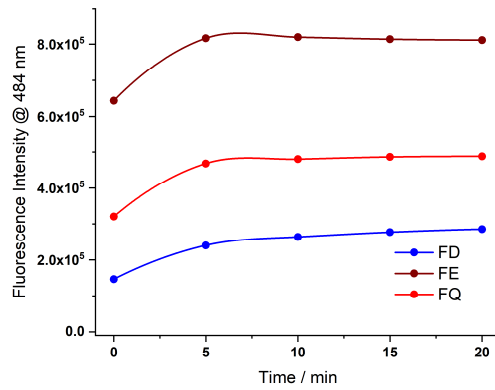

**Figure S17.** Fluorescence intensity changes at 484 nm are plotted against time at pH 5.0.

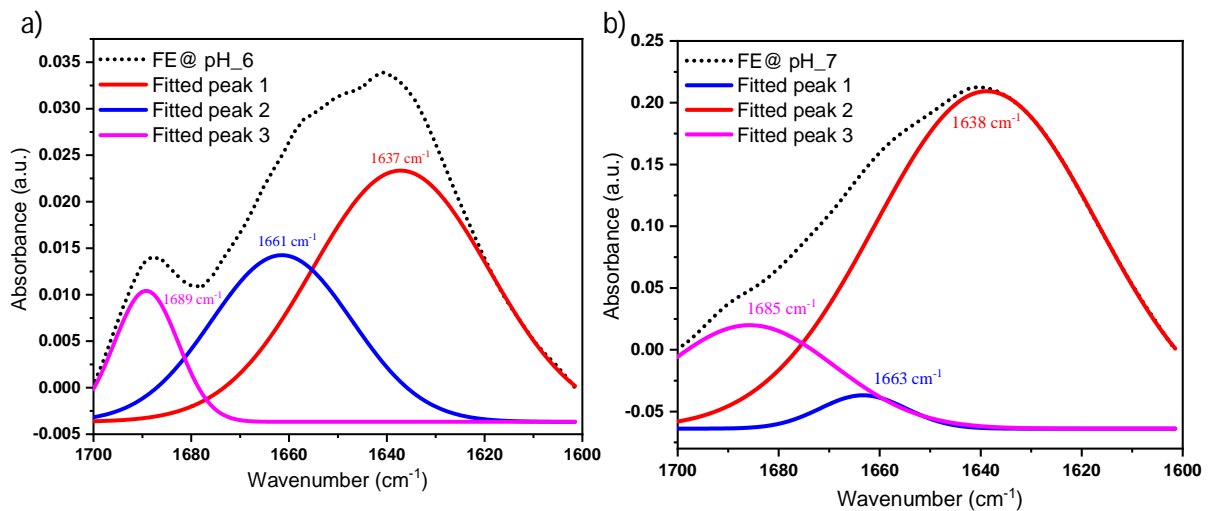

**Figure S18.** Deconvoluted FT-IR data of FE a) at pH 6.0 and b) at pH 7.0 respectively. Deconvoluted data showed that major contribution coming from  $\beta$ -sheet conformation.

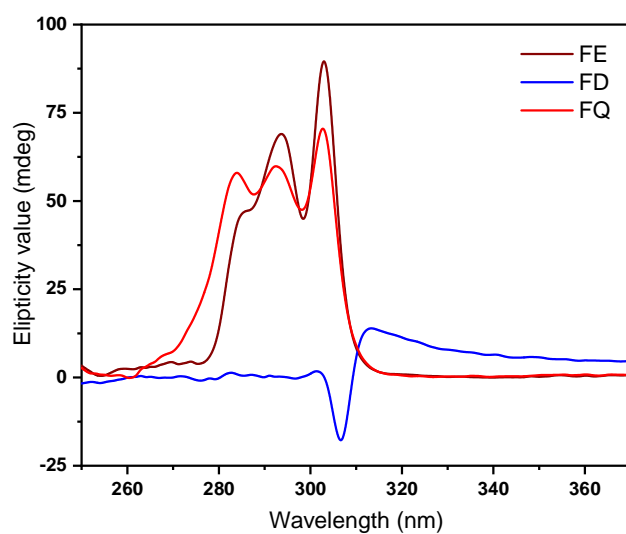

**Figure S19.** CD spectra of the three gelators at pH 6.0 with their corresponding MGC value.

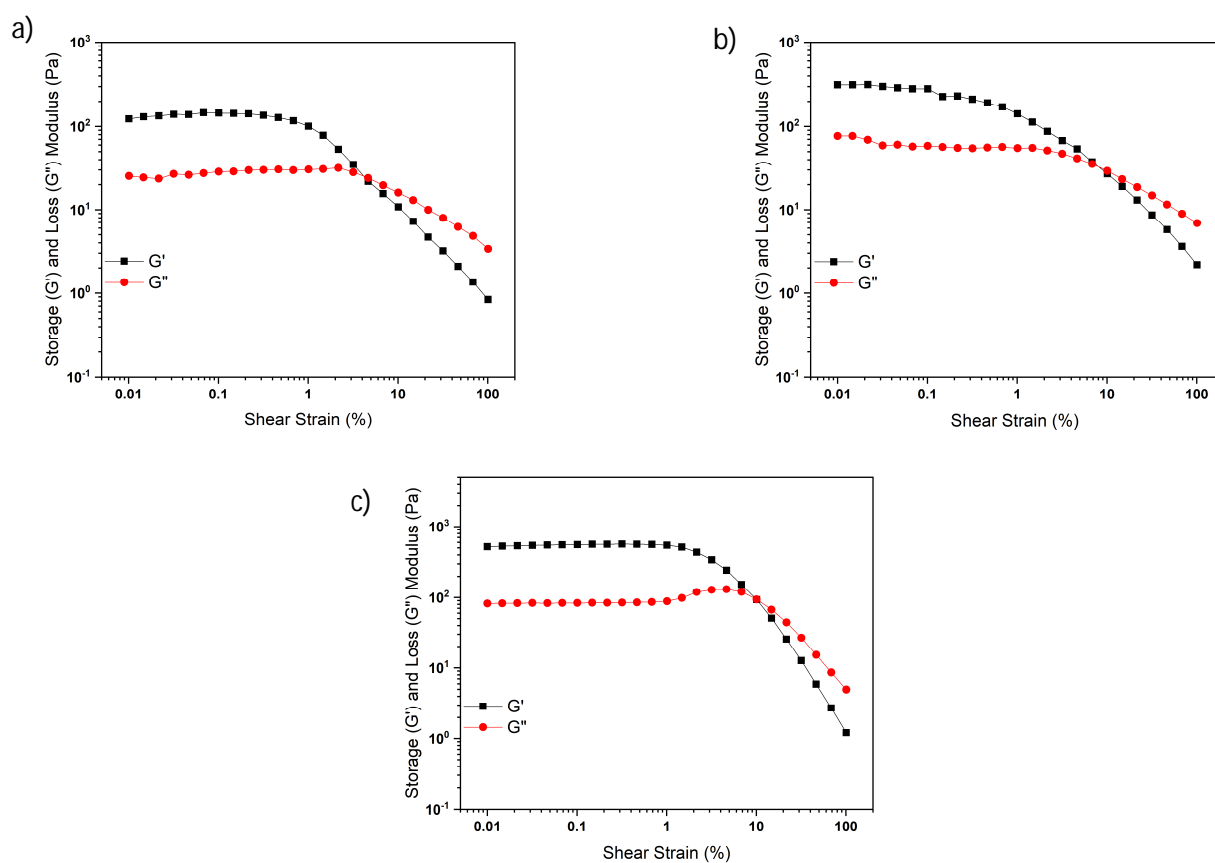

**Figure S20.** Strain sweep experiments of hydrogels were prepared from a) FE, b) FD and c) FQ at pH 7.0.
